# Supplementary material for: The Combined Effects of Cannabis, Methamphetamine, and HIV on Neurocognition
Source: MDPI journal article supplement (doi:10.3390/v15030674), 2023-03-03
Supplement: s1 [file s1]

**Supplementary Table S2.** Demographic, medical comorbidity, and psychiatric characteristics, split by substance use group and for the overall sample of people living without HIV (PLWoH).

|                                            | <b>M+C+ (N=116)</b> | <b>M-C+ (N=59)</b> | <b>M+C- (N=78)</b> | <b>M-C- (N=170)</b> | <b>Total (N=423)</b> | <b>p-value<sup>a</sup></b> |
|--------------------------------------------|---------------------|--------------------|--------------------|---------------------|----------------------|----------------------------|
| <b>Demographic Characteristics</b>         |                     |                    |                    |                     |                      |                            |
| Age                                        | 43.5 (11.3)         | 44.8 (15.8)        | 43.0 (11.1)        | 46.1 (16.4)         | 44.6 (14.2)          | 0.431                      |
| Sex - Male                                 | 92 (79.3%)          | 44 (74.6%)         | 56 (71.8%)         | 112 (65.9%)         | 304 (71.9%)          | 0.094                      |
| Education Years                            | 12.0 (2.2)          | 13.8 (2.5)         | 12.6 (2.4)         | 15.0 (2.2)          | 13.6 (2.6)           | < 0.001                    |
| Estimated Premorbid Verbal IQ <sup>b</sup> | 98.04 (9.07)        | 104.98 (11.77)     | 97.59 (11.82)      | 107.1 (11.44)       | 102.57 (11.78)       | < 0.001                    |
| Ethnicity                                  |                     |                    |                    |                     |                      | 0.824                      |
| Asian American Pacific Islander            | 0 (0.0%)            | 1 (1.7%)           | 2 (2.6%)           | 4 (2.4%)            | 7 (1.7%)             |                            |
| Black                                      | 19 (16.4%)          | 11 (18.6%)         | 12 (15.4%)         | 21 (12.4%)          | 63 (14.9%)           |                            |
| Hispanic                                   | 20 (17.2%)          | 11 (18.6%)         | 13 (16.7%)         | 37 (21.8%)          | 81 (19.1%)           |                            |
| Other                                      | 3 (2.6%)            | 2 (3.4%)           | 5 (6.4%)           | 7 (4.1%)            | 17 (4.0%)            |                            |
| White                                      | 74 (63.8%)          | 34 (57.6%)         | 46 (59.0%)         | 101 (59.4%)         | 255 (60.3%)          |                            |
| <b>Medical Comorbidity</b>                 |                     |                    |                    |                     |                      |                            |
| Hypertension                               | 19 (16.4%)          | 17 (28.8%)         | 8 (10.3%)          | 41 (24.3%)          | 85 (20.1%)           | 0.016                      |
| Hyperlipidemia                             | 15 (12.9%)          | 9 (15.3%)          | 10 (12.8%)         | 26 (15.4%)          | 60 (14.2%)           | 0.914                      |
| Diabetes                                   | 10 (8.6%)           | 7 (11.9%)          | 5 (6.4%)           | 12 (7.1%)           | 34 (8.1%)            | 0.637                      |
| Hepatitis-C Virus Infection                | 39 (33.6%)          | 8 (13.6%)          | 15 (19.2%)         | 21 (12.4%)          | 83 (19.7%)           | < 0.001                    |
| Chronic Pulmonary Disease                  | 18 (15.5%)          | 7 (11.9%)          | 10 (12.8%)         | 20 (11.8%)          | 55 (13.0%)           | 0.821                      |
| <b>Psychiatric Characteristics</b>         |                     |                    |                    |                     |                      |                            |
| Lifetime Major Depression                  | 45 (38.8%)          | 24 (40.7%)         | 25 (32.1%)         | 46 (27.2%)          | 140 (33.2%)          | 0.117                      |
| Current Major Depression                   | 9 (7.8%)            | 5 (8.5%)           | 9 (11.5%)          | 6 (3.5%)            | 29 (6.9%)            | 0.111                      |
| BDI-II Total Score <sup>c</sup>            | 13.45 (11.84)       | 5.81 (6.99)        | 13.78 (10.76)      | 4.92 (6.95)         | 9 (10.14)            | < 0.001                    |

*Note: <sup>a</sup>Descriptive statistics were computed and compared using Kruskal–Wallis analysis of variance for continuous variables and non-parametric chi-square tests for categorical variables. <sup>b</sup>Determined by the reading subtest of the Wide Range Achievement Test – 4<sup>th</sup> edition (WRAT-4). <sup>c</sup>BDI-II: Beck Depression Inventory – 2<sup>nd</sup> edition.*
