# Supplementary material for: The Combined Effects of Cannabis, Methamphetamine, and HIV on Neurocognition
Source: MDPI journal article supplement (doi:10.3390/v15030674), 2023-03-03
Supplement: s1 [file s1]

**Supplementary Table S1.** Demographic, medical comorbidity, and psychiatric characteristics of people living with HIV (PLWH) and people without HIV (PLWoH).

| <b>Demographic Characteristics</b>          | <b>PLWoH (N=423)</b> | <b>PLWH (N=472)</b> | <b>Total (N=895)</b> | <b>p-value<sup>a</sup></b> |
|---------------------------------------------|----------------------|---------------------|----------------------|----------------------------|
| Age (Years)                                 | 44.6 (14.2)          | 45.6 (11.5)         | 45.1 (12.9)          | 0.258                      |
| Sex - Male, n (%)                           | 304 (71.9%)          | 408 (86.4%)         | 712 (79.6%)          | 0.025                      |
| Education Years                             | 13.6 (2.6)           | 13.9 (2.5)          | 13.8 (2.5)           | 0.04                       |
| Race/Ethnicity                              |                      |                     |                      | 0.212                      |
| White, n (%)                                | 255 (60.3%)          | 286 (60.6%)         | 541 (60.4%)          |                            |
| Black, n (%)                                | 63 (14.9%)           | 98 (20.8%)          | 161 (18.0%)          |                            |
| Hispanic, n (%)                             | 81 (19.1%)           | 68 (14.4%)          | 149 (16.6%)          |                            |
| Asian, n (%)                                | 7 (1.7%)             | 7 (1.5%)            | 14 (1.6%)            |                            |
| Other, n (%)                                | 17 (4.0%)            | 13 (2.8%)           | 30 (3.4%)            |                            |
| Sexual Orientation                          |                      |                     |                      | < 0.001                    |
| Bisexual, n (%)                             | 33 (7.9%)            | 41 (8.7%)           | 74 (8.3%)            |                            |
| Heterosexual, n (%)                         | 299 (71.2%)          | 101 (21.5%)         | 400 (45.0%)          |                            |
| Homosexual, n (%)                           | 88 (21.0%)           | 327 (69.7%)         | 415 (46.7%)          |                            |
| Estimated Premorbid Verbal IQ <sup>b</sup>  | 102.6 (11.8)         | 102.9 (11.8)        | 102.7 (11.8)         | 0.882                      |
| <b>Medical Comorbidity</b>                  |                      |                     |                      |                            |
| Hypertension, n (%)                         | 85 (20.1%)           | 153 (32.5%)         | 238 (26.7%)          | < 0.001                    |
| Hyperlipidemia, n (%)                       | 60 (14.2%)           | 135 (28.7%)         | 195 (21.8%)          | < 0.001                    |
| Diabetes, n (%)                             | 34 (8.1%)            | 51 (10.8%)          | 85 (9.5%)            | 0.162                      |
| Hepatitis C Infection, n (%)                | 83 (19.7%)           | 74 (15.7%)          | 157 (17.6%)          | 0.117                      |
| <b>Depression &amp; Depressive Symptoms</b> |                      |                     |                      |                            |
| Lifetime Major Depressive Disorder, n (%)   | 140 (33.2%)          | 263 (55.7%)         | 403 (45.1%)          | < 0.001                    |
| Current Major Depressive Disorder, n (%)    | 29 (6.9%)            | 55 (11.7%)          | 84 (9.4%)            | 0.014                      |
| BDI-II Total Score <sup>c</sup>             | 9.0 (10.1)           | 11.3 (10.7)         | 10.2 (10.5)          | < 0.001                    |
| <b>Substance Use Disorder</b>               |                      |                     |                      |                            |
| DSM-IV Abuse/Dependence                     |                      |                     |                      | 0.959                      |
| M+C+                                        | 116 (27.4%)          | 135 (28.6%)         | 251 (28.0%)          |                            |
| M-C+                                        | 59 (13.9%)           | 68 (14.4%)          | 127 (14.2%)          |                            |
| M+C-                                        | 78 (18.4%)           | 82 (17.4%)          | 160 (17.9%)          |                            |
| M-C-                                        | 170 (40.2%)          | 187 (39.6%)         | 357 (39.9%)          |                            |
| Lifetime - Alcohol                          | 237 (56.2%)          | 250 (53.0%)         | 487 (54.5%)          | 0.338                      |
| Lifetime - Cocaine                          | 95 (22.5%)           | 130 (27.5%)         | 225 (25.2%)          | 0.084                      |
| Lifetime - Opioid                           | 52 (12.3%)           | 26 (5.5%)           | 78 (8.7%)            | < 0.001                    |

|                   |          |          |          |    |
|-------------------|----------|----------|----------|----|
| Current - Alcohol | 0 (0.0%) | 0 (0.0%) | 0 (0.0%) | NA |
| Current - Cocaine | 0 (0.0%) | 0 (0.0%) | 0 (0.0%) | NA |
| Current - Opioid  | 0 (0.0%) | 0 (0.0%) | 0 (0.0%) | NA |

---

*Note. <sup>a</sup>Descriptive statistics were computed and compared using non-parametric tests - Kruskal–Wallis analysis of variance for continuous variables and non-parametric chi-square tests for categorical variables. <sup>b</sup>Determined by the reading subtest of the Wide Range Achievement Test – 4<sup>th</sup> edition (WRAT-4). <sup>c</sup>BDI-II: Beck Depression Inventory – 2<sup>nd</sup> edition. Medical comorbidity variables indicate the presence or absence of the conditions in participants' medical history.*

---
